# Supplementary material for: NK Cell Patterns in Idiopathic Inflammatory Myopathies with Pulmonary Affection
Source: MDPI journal article supplement (doi:10.3390/cells10102551), 2021-09-27
Supplement: s1 [file s1]

**Table S1.** Antibodies used for flow cytometric analysis of PBMCs.

| <b>Fluorochrome</b> | <b>CD No. Name</b>                     | <b>Clone</b> | <b>Company</b>  | <b>Order No.</b> |
|---------------------|----------------------------------------|--------------|-----------------|------------------|
| FITC                | <b>pan-KIR: CD158a/h, b/j, e1/2, i</b> | 11PB6        | Miltenyi        | 130-099-209      |
| FITC                | <b>Granzyme K</b>                      | GM6C3        | SantaCruz       | sc56125-FTIC     |
| PE                  | <b>CD56</b>                            | N901         | Beckman Coulter | A07788           |
| PE                  | CD159c/NKG2C                           | REA205       | Miltenyi        | 130-103-635      |
| BV785               | CD16                                   | 3G8          | Biolegend       | 302046           |
| ECD                 | <b>CD20</b>                            | B9E9         | Beckman Coulter | IM3607U          |
| PerCP/Cy5.5         | <b>CD226 DNAM-1</b>                    | 11A8         | Biolegend       | 338314           |
| PC7                 | <b>CD159a/NKG2A</b>                    | Z199         | Beckman Coulter | B10246           |
| PECy7               | <b>Granzyme A</b>                      | GzA-3G8.5    | eBiosciences    | 25-9177-42       |
| APC                 | <b>CD3</b>                             | Hit3a        | Biolegend       | 300312           |
| BV510               | <b>CD4</b>                             | OKT4         | Biolegend       | 317444           |
| BV605               | <b>CD45RO</b>                          | UCHL1        | Biolegend       | 304238           |
| APC                 | <b>CD336/NKp44</b>                     | P44-8        | Biolegend       | 325110           |
| eFluor660           | <b>Granzyme M</b>                      | 4B2G4        | eBiosciences    | 50-9774-42       |
| APC                 | <b>CD336/NKp44</b>                     | P44-8        | Biolegend       | 325110           |
| APC-A700            | <b>CD8</b>                             | B9.11        | Beckman Coulter | PN A66332        |
| PE                  | <b>Granzyme B</b>                      | REA226       | Miltenyi        | 130-101-351      |
| APC-A700            | <b>NKG2D</b>                           |              | R&D             | FAB139N-100      |
| APC/Cy7             | <b>CD244/2B4</b>                       | C1.7         | Biolegend       | 329518           |
| PacB                | <b>CD57</b>                            | HCD57        | Biolegend       | 322316           |
| VioBlue             | <b>Perforin</b>                        | REA1061      | Miltenyi        | 130-096-671      |
| Biotin              | <b>CD337/NKp30</b>                     | AF29-4D12    | Miltenyi        | 130-092-553      |
| BV650               | <b>CD335/NKp46</b>                     | 9,00E+02     | Biolegend       | 331927           |

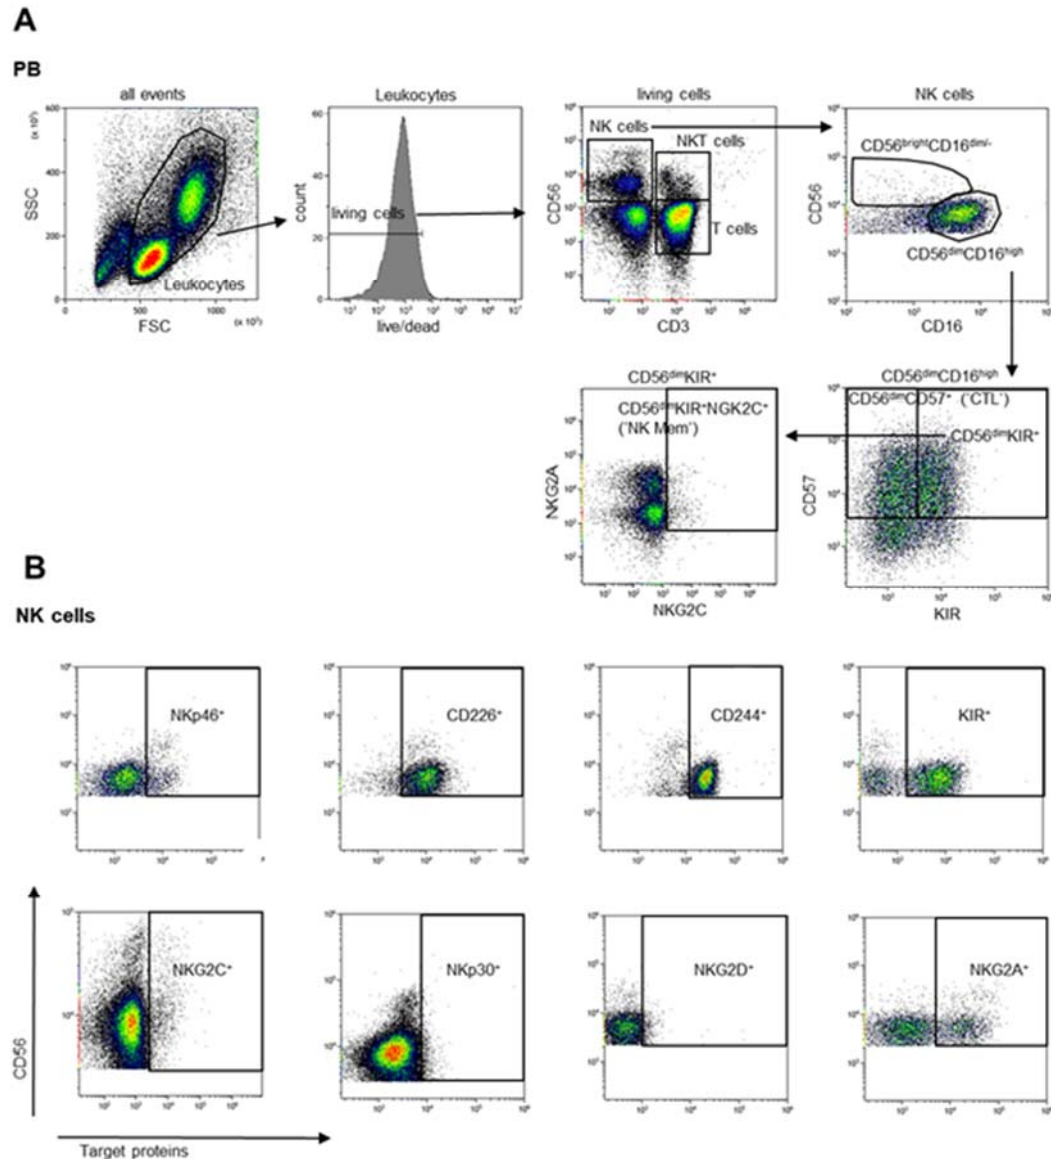

**Figure S1.** Gating strategy. (A) Single cells from the peripheral blood (PB) were simultaneously analyzed by flow cytometry. Total leukocytes were identified by forward scatter (FSC) and sideward scatter (SSC). Live/dead discrimination was determined using the amine reactive dye Aqua. From these cells, we identified lymphocyte subsets based on CD3 signal and CD56 expression. Next, we selected natural killer (NK) cell subsets based on CD56 and CD16 expression.  $CD56^{dim}CD16^{high}$  were further differentiated based CD57 und KIR expression into cytotoxic T cell subsets (CTL) and memory NK cells (memory NK). (B) NK cells,  $CD56^{bright}CD16^{dim/-}$ ,  $CD56^{dim}CD16^{high}$  CTL and memory NK cells were differentiated based on their surface marker expression in NKp46, CD226, CD244, KIR, NKG2C, Nkp30, NKG2D and NKG2A positive cells (here exemplarily shown at total NK cells).
